# Supplementary material
Source: PubMed Central journal article supplement (PMC3951241)

**Neurosteroid Analogues. 18. Structure–activity Studies of *ent*-Steroid Potentiators of  $\gamma$ -Aminobutyric Acid type A Receptors and Identification of *ent*-Steroids with Activities Comparable to Those of Alphaxalone and Allopregnanolone.**

Mingxing Qian, Kathiresan Krishnan, Eva Kudova, Ping Li, Brad D. Manion, Amanda Taylor, George Elias, Gustav Akk, Alex S. Evers, Charles F. Zorumski, Steven Mennerick, Douglas F. Covey

Supporting Information  
Table of Contents

|                                                                                                                                                                                     |    |
|-------------------------------------------------------------------------------------------------------------------------------------------------------------------------------------|----|
| Required elemental analysis results.....                                                                                                                                            | S2 |
| Optional elemental analysis results.....                                                                                                                                            | S3 |
| Figure S1. Alternate views of alignments for compounds <b>1</b> with <i>ent</i> - <b>1</b> , <i>ent</i> - <b>1</b> with <b>4</b> ,<br>and <i>ent</i> - <b>9</b> with <b>5</b> ..... | S4 |
| Figure S2. Structures <i>ent</i> -steroids (oriented according to the model shown<br>in Figure 1) and steroids in Table 1 with their TBPS IC <sub>50</sub> values.....              | S5 |

### Elemental Analysis Data for Required Previously Unknown Evaluated Compounds

**ent-2:** Anal. (C<sub>20</sub>H<sub>32</sub>O<sub>3</sub>): C, 74.96 %; H, 10.06 %. Found: C, 75.04 %; H, 9.97 %.  
**2:** Anal. (C<sub>20</sub>H<sub>32</sub>O<sub>3</sub>): C, 74.96%; H, 10.06%. Found: C, 75.04%; H, 9.93%.  
**ent-3:** (C<sub>20</sub>H<sub>32</sub>O<sub>3</sub>): C, 74.96 %; H, 10.06 %. Found: C, 75.13 %; H, 9.90 %.  
**3:** Anal. (C<sub>20</sub>H<sub>32</sub>O<sub>3</sub>): C, 74.96%; H, 10.06%. Found: C, 75.01%; H, 9.95%.  
**ent-7:** Anal. (C<sub>19</sub>H<sub>30</sub>O<sub>3</sub>): C, 78.57%; H, 10.41%; found: C, 78.36%; H, 10.58%.  
**7:** Anal. (C<sub>19</sub>H<sub>30</sub>O<sub>3</sub>): C, 78.57%; H, 10.41%; found: C, 78.78%; H, 10.61%.  
**ent-8:** Anal. (C<sub>20</sub>H<sub>32</sub>O<sub>3</sub>): C, 74.96 %; H, 10.06 %. Found: C, 74.78 %; H, 9.86 %.  
**8:** Anal. (C<sub>20</sub>H<sub>32</sub>O<sub>3</sub>): C, 74.96%; H, 10.06%; found: C, 74.69%; H, 9.91%.  
**ent-9:** Anal. (C<sub>20</sub>H<sub>32</sub>O<sub>3</sub>): C, 74.96 %; H, 10.06 %. Found: C, 75.07 %; H, 9.96%.  
**9:** Anal. (C<sub>20</sub>H<sub>32</sub>O<sub>3</sub>): C, 74.96 %; H, 10.06 %. Found: C, 75.13 %; H, 10.14%.  
**ent-10:** Anal. (C<sub>18</sub>H<sub>28</sub>O<sub>2</sub>): C, 78.21 %; H, 10.21 %. Found: C, 78.16 %; H, 10.12 %.  
**ent-11:** Anal. (C<sub>18</sub>H<sub>28</sub>O<sub>2</sub>): C, 78.21 %; H, 10.21 %. Found: C, 78.40 %; H, 10.15 %.  
**ent-12:** Anal. (C<sub>17</sub>H<sub>26</sub>O<sub>2</sub>): C, 77.82 %; H, 9.99 %. Found: C, 78.02 %; H, 9.79 %.

### Optional Elemental Analysis Data for Selected Intermediate Compounds

**ent-14:** Anal (C<sub>19</sub>H<sub>30</sub>O<sub>2</sub>): C, 78.57 %; H, 10.41 %. Found: C, 78.77%; H, 10.22%.  
**ent-31:** Anal (C<sub>29</sub>H<sub>38</sub>O<sub>4</sub>): C, 77.30 %; H, 8.50 %. Found: C, 77.55 %; H, 8.26%.  
**ent-32:** Anal (C<sub>22</sub>H<sub>32</sub>O<sub>5</sub>): C, 70.18 %; H, 8.57 %. Found: C, 70.30%; H, 8.59 %.  
**ent-33:** Anal (C<sub>20</sub>H<sub>30</sub>O<sub>3</sub>): C, 75.43 %; H, 9.50 %. Found: C, 75.17 %; H, 9.39 %.  
**51:** Anal (C<sub>19</sub>H<sub>28</sub>O<sub>4</sub>): C, 71.22 %; H, 8.81 %. Found: C, 71.12 %; H, 8.68 %.  
**52:** Anal (C<sub>17</sub>H<sub>26</sub>O<sub>2</sub>): C, 77.82 %; H, 9.99 %. Found: C, 77.69 %; H, 10.02 %  
**53:** Anal (C<sub>24</sub>H<sub>32</sub>O<sub>4</sub>S): C, 69.20 %; H, 7.74 %. Found: C, 69.09 %; H, 7.35 %.  
**54:** Anal (C<sub>25</sub>H<sub>31</sub>O<sub>3</sub>S): C, 72.42 %; H, 8.27 %. Found: C, 72.59 %; H, 8.07 %.  
**ent-57:** Anal (C<sub>17</sub>H<sub>22</sub>O<sub>2</sub>): C, 79.03 %; H, 8.58 %. Found: C, 79.09 %; H, 8.38 %.

Molecular Modeling. (A) Edge view of alignment of compounds **1** and *ent*-**1**. (B) Edge view of alignment of compounds **4** and *ent*-**1**. (C) Top view of alignment of compounds **5** and *ent*-**9**. (D) Edge view of alignment of compounds **5** and *ent*-**9**.

Figure S1

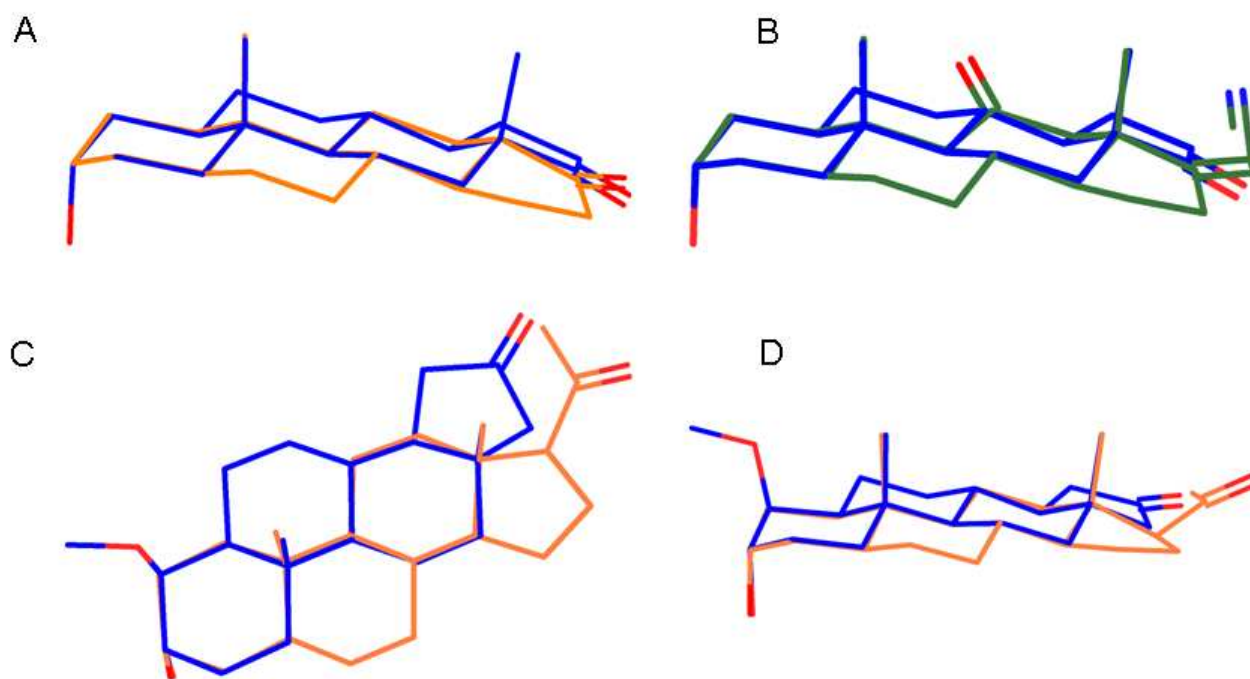

**Figure S1. [<sup>35</sup>S]TBPS Results.** Structures of *ent*-steroids are in orientations shown for *ent*-1 in Figure 1 (i.e.,  $\alpha$  face toward the reader). Numbers in parentheses are IC<sub>50</sub> values for [<sup>35</sup>S]TBPS displacement. Error limits for IC<sub>50</sub> values and slope values for binding curves are given in Table 1. Enantiomers are groups as pairs to facilitate comparison of enantiomer IC<sub>50</sub> values.

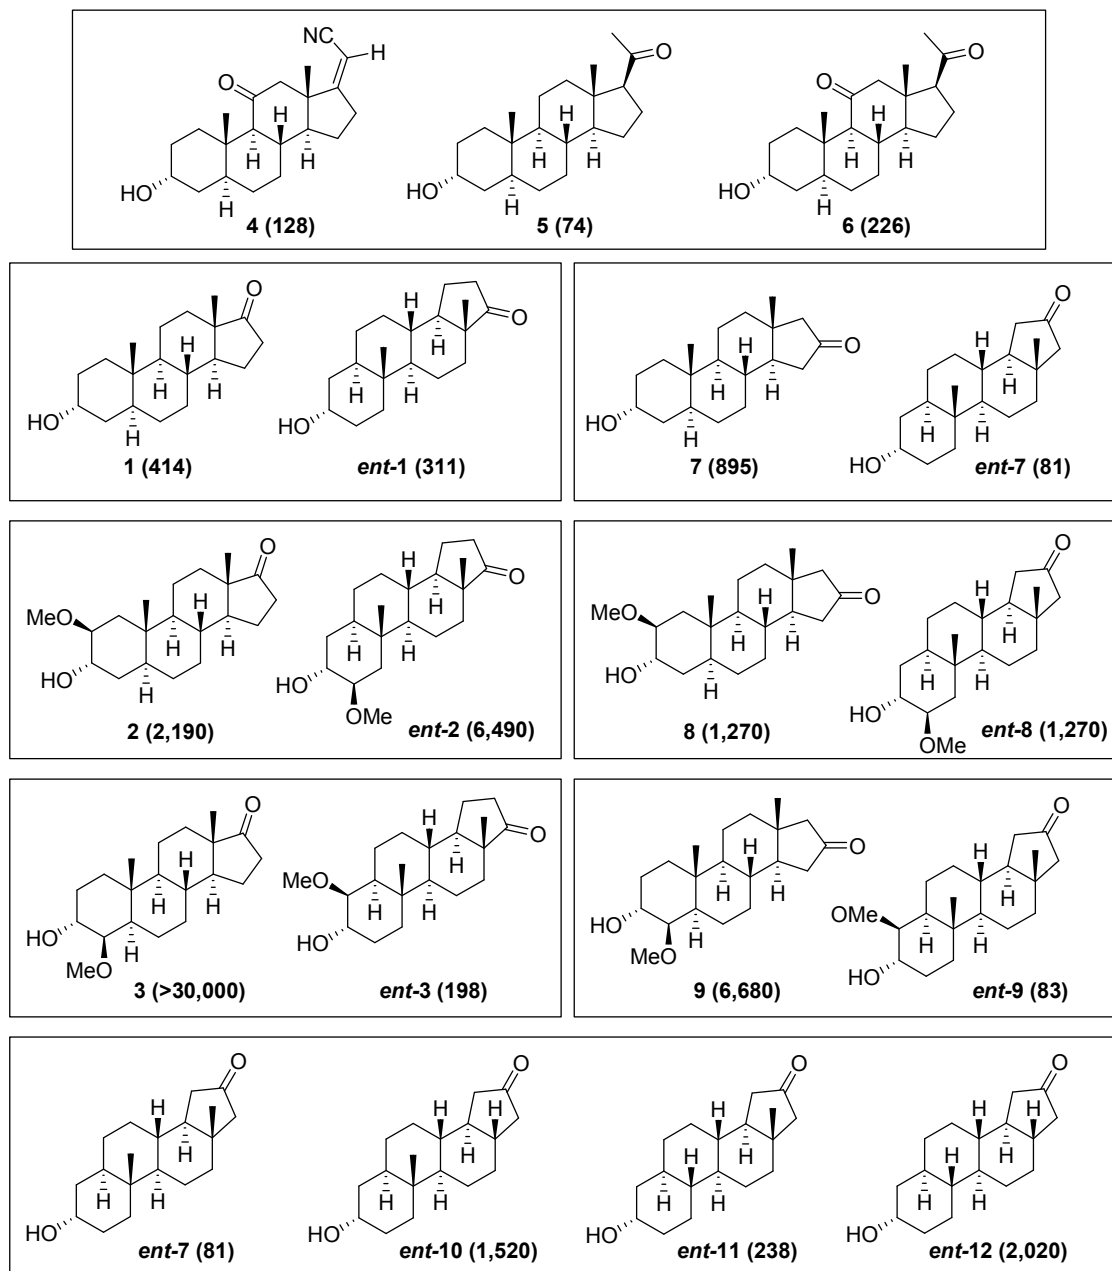

Supplement: NIHMS551556-supplement-1_si_001.pdf [file NIHMS551556-supplement-1_si_001.pdf]
